# Supplementary material for: GGGGCC microsatellite RNA is neuritically localized, induces branching defects, and perturbs transport granule function
Source: eLife. 2015 Dec 9;4:e08881. doi: 10.7554/eLife.08881 (PMC4758954; doi:10.7554/eLife.08881)
Supplement: Supplementary file 1. — Lists of the RNA binding proteins upregulated or downregulated in cortical samples from C9orf72 patients (Donnelly et al., 2013). Analysis is presented in Table 2. DOI: http://dx.doi.org/10.7554/eLife.08881.018 [file elife-08881-supp1.xlsx]

## Sheet: Sheet1
Table S1. Genes related to RNA granules that are misregulated in brain tissue from C9ORF72 patients.
RNA-binding proteins upregulated in C9ORF72 cortex					RNA-binding proteins downregulated in C9ORF72 cortex					mRNA-binding proteins upregulated in C9ORF72 cortex					mRNA-binding proteins downregulated in C9ORF72 cortex					FMRP targets upregulated in C9ORF72 Cortex				FMRP targets downregulated in C9ORF72 Cortex				STAT5B targets upregulated in C9ORF72 Cortex				STAT5B targets downregulated in C9ORF72 Cortex
PEG10					HNRNPL					HNRNPH1					HNRNPL					NEDD4				DIDO1				CNOT6L				ARSJ
HNRNPH1					MRP63					CNOT6L					TAF15					KIAA2018				TLN2				CYLD				SPTLC1
RRP15					PTGES3					HNRNPA1					IGF2BP1					PDE4DIP				HERC2				PAG1				DIDO1
ZC3HAV1L					TAF15					NOVA1					MOV10L1					SON				KIAA0100				TLR6				KDM2B
CNOT6L					MRPL36					PSIP1					XRCC6					AKAP9				CPT1C				MALT1				PIGV
HNRNPA1					DKC1					HNRNPA3					TUFM					PCNX				TAOK2				PDE4DIP				SENP3
PUS7L					POP7					METTL14					GTF2F1					MYST3				GTF3C1				LYST				ZC3H4
ZCCHC6					SNRPD3					NCBP1					SAP18					MLL				ZC3H7B				STAT4				C3orf18
OAS2					IGF2BP1					SON					MRTO4					UBR5				EXTL3				OBFC1				PTGER2
NOVA1					MOV10L1					CDC5L					DRG2					ANAPC1				SMARCC2				STK4				GRAP2
PSIP1					NOC2L					THOC2					SSU72					MIB1				ARHGEF11				RNF145				IL22RA2
HNRNPA3					XRCC6					HELZ					SCAF1					HIPK3				CACNB3				MIB1				ZC3H3
METTL14					RPS17					CPSF2					IPO4					DST				EEF1A2				RB1				MEOX1
NCBP1					ZC3H7B					CSTF3					NUTF2					ALS2				SCAF1				SMCHD1				ARHGAP10
SMAD4					RPL3					ZC3H14					RUVBL2					MLL5				TRIM3				YLPM1				ACTN4
PRPF40A					TUFM					DZIP1					DGCR14					RC3H2				PINK1				AVL9				ENPEP
DNAJC21					MRPL10					DBR1					MEX3D					ANKRD17				KIAA0664				USP12				CCND3
KRR1					GTF2F1					RBM15					A1CF					SPTBN1				IPO4				LCP1				ADAMTSL4
IPO8					PPP1R8					CNBP					RBM15B					APC				ZC3H4				TRIM22				GCNT1
SRFBP1					MRPL28					BCLAF1					ZC3H3					ARID2				DGKZ				PTPRK				CEACAM1
DDX60L					HEXIM2					LUC7L3					SKIV2L					PIKFYVE				EHMT2				EXOC2				C14orf182
SON					PDCD7					TIA1					EIF3B					SETX				APBB1				GBP1				B3GNT6
NOL11					RPL7					RBM25					RAVER1					EP300				ALDOA				TNRC6B				IRF4
CDC5L					MRPL12					THOC1					RBM20					NUP98				PIP5K1C				ASH1L				RASSF5
THOC2					SAP18					SF3B1					LIN28A					XPO7				STK25				N4BP2				COL25A1
HELZ					RPL21					RC3H2					DAZ2					TNRC6B				RUSC1				TRIO				IL2RB
DDX50					UBTF					AQR					DAZ1					PUM2				CTBP1				UBTD2				WDR25
TOP1					EEF1A2					G3BP1					POLRMT					RPRD2				ADRBK1				KLF6				ZBP1
CPSF2					MRTO4					PURA					PUF60					ASH1L				RAP1GAP				PTPN2				ACOXL
CSTF3					DRG2					YTHDC2					CPSF1					CAMSAP1L1				BAT3				UBE2K				LRRC61
FAM120C					SSU72					TIAL1					PPAN					FAM91A1				STRN4				ARNT				MYOM2
ZC3H14					ZC3HC1					TNPO3					RBMXL2					MED13				RAP1GAP2				CREM				GSDMD
OBFC1					ZC3H12A					SETX					HDLBP					TNKS				SPRN				HIF1A				CD6
ZC3H7A					SCAF1					HNRNPA2B1					XAB2					TRIO				RUSC2				LAMA3				TG
ZC3H12C					RRP12					RBMX					POLR2E					DICER1				SYNPO				EED				XPNPEP2
DZIP1					DGCR8					CNOT6					DND1					NCOR1				PACS2				SOS1				HFE2
GNL2					NPM3					FXR1					MEX3A					ATF7IP				HDLBP				CMTM3
DBR1					IPO4					HNRNPR					JAKMIP1					FAM190B				BRSK1				RSBN1
EIF2AK2					NUTF2					XPO7					FASTK					TCF4				DAGLA				PDCD4
MRPS14					ZC3H4					TNRC6B					ESRP2					NRIP1				SMPD3				LMAN1
RBM15					MRPL54					RBM26					EIF4E1B					ARHGEF12				SPEG				ZRSR2
SUZ12					RUVBL2					TCERG1					MEX3B					KDM5C				KIAA0284				RAB7A
PRPF39					MEPCE					YTHDF3					POLR2L					ELMO2				SLC4A3				IFI16
CNBP					YRDC					PUM2					ADAD2					SPIRE1				ATG2A				RPS6KA5
XRN1					PWP2					ATXN2					RBMX2					NCOA2				MAP7D1				CLEC2D
BCLAF1					DGCR14					ANGEL2										AAK1				ATP13A2				SSH2
UTP18					FARSA					PAPOLA										KLC1				EEF2				SMARCA2
SNRPA1					MEX3D					RBM39										SETD5				INTS1				AGFG1
LUC7L3					UBA52					EIF3E										CREBBP				FBXL19				PDE3B
TIA1					A1CF					TARDBP										SMARCA2				NEURL4				ENPEP
ZC3H6					ZC3H18					PPWD1										REV3L				ACCN1				MGAT4A
GNL3L					VARS					DCP2										TSPAN7				SRCIN1				PCGF5
TROVE2					DHX37					RBBP6										MED13L				SPTBN2				RBMS1
RBM25					TOE1					TNRC6A										SOBP				MAPK8IP1				WASL
THOC1					FTSJ2					EIF3M														AGRN				BCL2A1
ZFC3H1					RBM15B					SMG7														TPPP				DGKD
SF3B1					RPS8					ZRANB2														RTN4R				PTPRC
RPS7					RPS2					FUBP1														BCL9L				MBNL1
EZH2					AIMP2					IGF2BP3														TTBK1				KIAA0355
DUS4L					RPL13A					CNOT4														TSC2				USP15
RC3H2					ZC3H3					CPSF6														NACAD				SNX9
AQR					SKIV2L					PATL1														AGAP3				KLF7
ANKRD17					MRPS26					SRRM1														HCN2				ARID5B
G3BP1					EIF3B					PURG														DOT1L				LCP2
PURA					LONP1					CWF19L2														IQSEC3				IL1R1
YTHDC2					CDK9					KPNB1														KCNT1				CD180
TIAL1					REXO4					RQCD1														BRSK2				CBLB
TNPO3					RAVER1					XPO4														PTPN5
SNRNP48					RBM20					PDCD4														CELSR2
SSB					TCOF1					ZRSR2														AATK
SETX					LIN28A					EIF2AK3														FBXL16
HNRNPA2B1					DAZ2					CNOT2														ARHGAP23
ZCCHC11					DAZ1					ZNF638														KIFC2
RBMX					POLRMT					TRA2B														TMEM151B
INTS8					AARS2					EIF2B5														PLCH2
SNRNP200					PES1					LUC7L														KIF1A
CNOT6					PUF60					RBM45														CASKIN1
RBM28					QTRT1					AGFG1														WNK2
FXR1					OASL					PABPC1														ATG9A
NOP58					CPSF1					DDX5														LINGO1
GPATCH8					PPAN					PCBP2														NCOR2
HNRNPR					RBMXL2					EIF4A1														CPLX2
TRMT61B					HDLBP					CAPRIN2														ADCY5
XPO7					TBL3					RBMS1														CKB
CCNT1					MRPL49					MBNL1														TNK2
TNRC6B					AARSD1					FTO														LYNX1
RBM26					GTPBP3																			KCNH3
ZCCHC9					DDX49																			LPHN1
TCERG1					XAB2																			KIAA0802
YTHDF3					TDRD1
PUM2					DNAJC17
ATXN2					DDX54
ANGEL2					POLR2E
PAPOLA					DND1
ASH1L					RPL18
MRPS30					EEF2
RBM39					INTS1
EIF3E					PTCD1
TARDBP					MEX3A
PPWD1					NUDT16L1
DCP2					PUSL1
RBBP6					JAKMIP1
TNRC6A					CTU2
EIF3M					FASTK
NUP153					PUS1
UTP23					RPUSD1
SMG7					MRPL4
ZRANB2					RRP9
FUBP1					NSUN5
IGF2BP3					ENDOG
DICER1					MRPS12
ADAT2					ZC3H12D
CNOT4					ESRP2
CPSF6					DDX51
EED					ZFR2
PATL1					EIF4E1B
MRPS31					ADAT3
PUS10					RPS5
SRRM1					PPARGC1B
TLR7					TERT
PURG					APOBEC3H
ZC3H8					MEX3B
CWF19L2					REXO1
SKIV2L2					POLR2L
KPNB1					ADAD2
RQCD1					TRPT1
XPO4					RBMX2
PRPF3					TDRD6
PDCD4					RNF113A
INTS10
MRPS21
ZRSR2
BCDIN3D
PRKRA
INTS6
PSPC1
EIF2AK3
SMAD5
CNOT2
ZNF638
LARS
TRA2B
EIF2B5
SNRNP40
LUC7L
SART3
RBM45
AGFG1
RARS2
EIF2S3
PABPC1
DDX5
ZCCHC7
PCBP2
EIF4A1
CAPRIN2
RPL41
NSUN6
MRPS27
RPL21
RPL5
TARS
RBMS1
MBNL1
FTO
RPL10
SNRPE
