# Supplementary figures and images for: GGGGCC microsatellite RNA is neuritically localized, induces branching defects, and perturbs transport granule function
Source: eLife journal article supplement (doi:10.7554/elife.08881), 2015-12-09

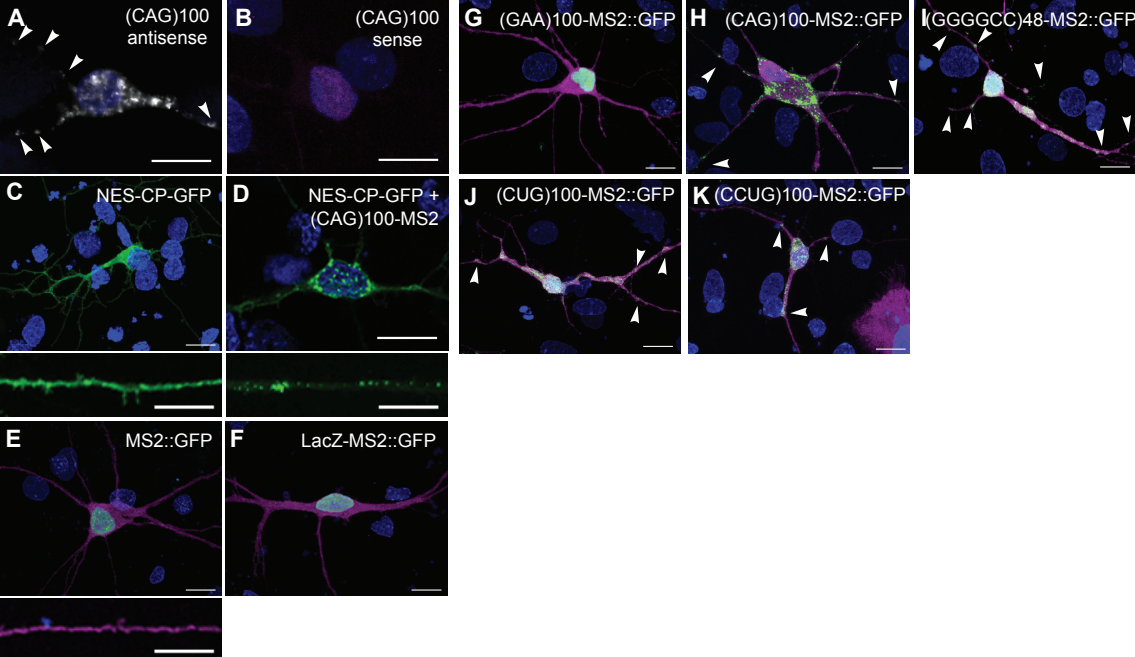

Figure 1–figure supplement 1. Schweizer Burguete et al.

Supplement: supp [file elife_poa_e08881_Figure_1_figure_supplement_1.pdf › elife_poa_e08881_Figure_1_figure_supplement_1.pdf]

A

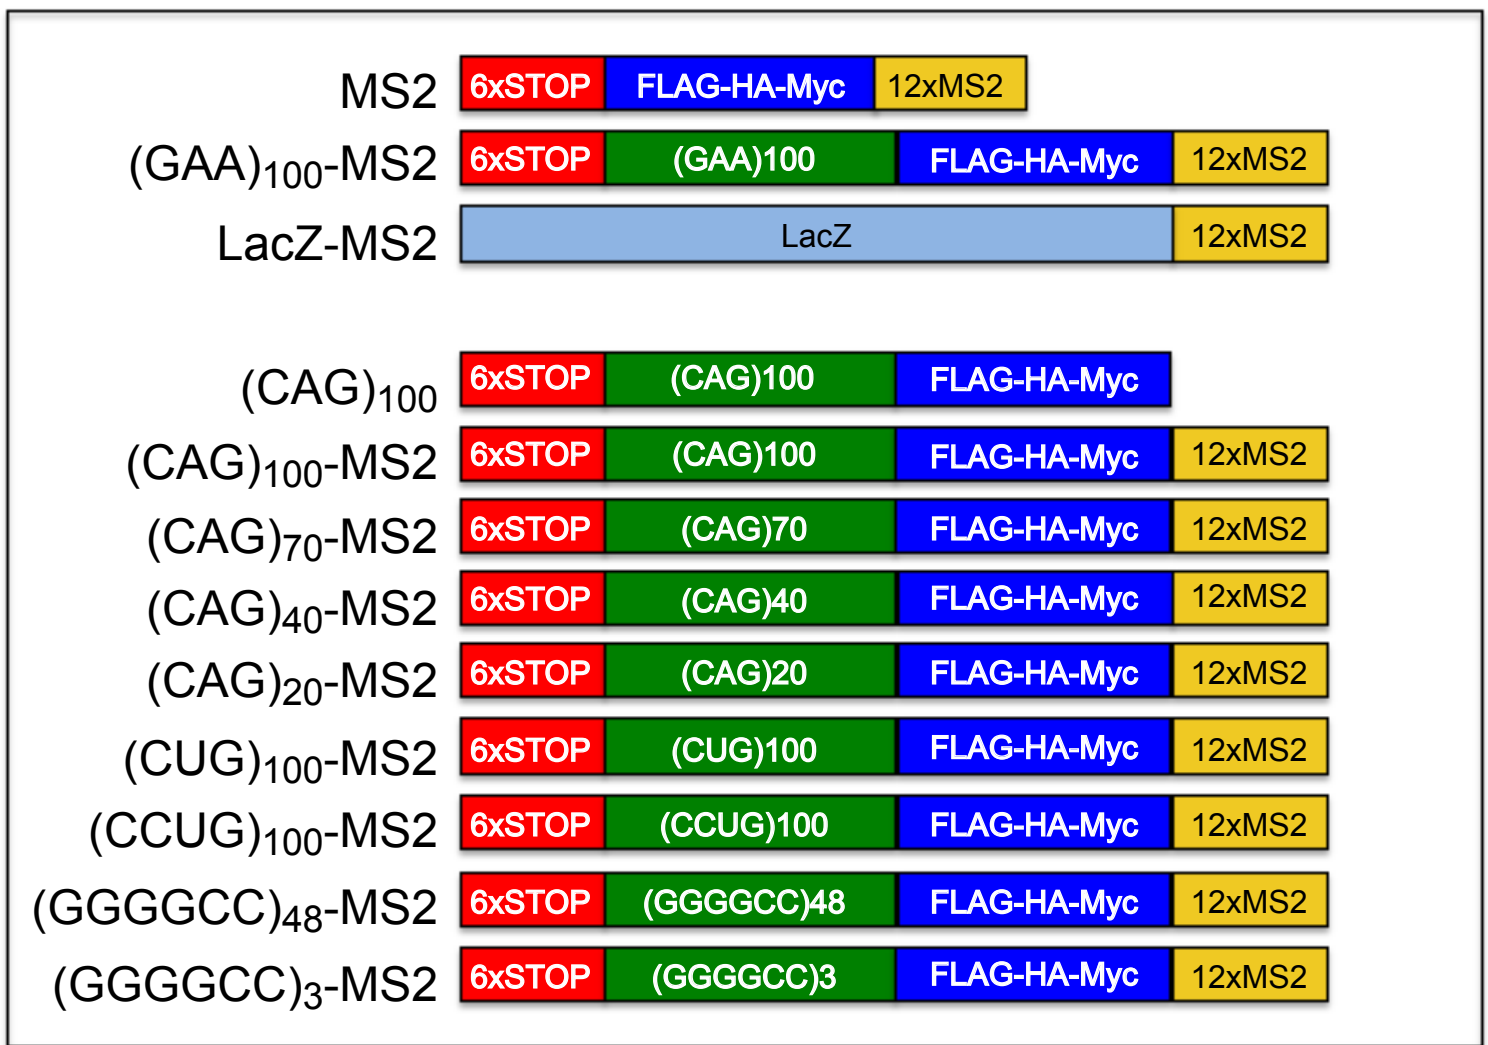

B

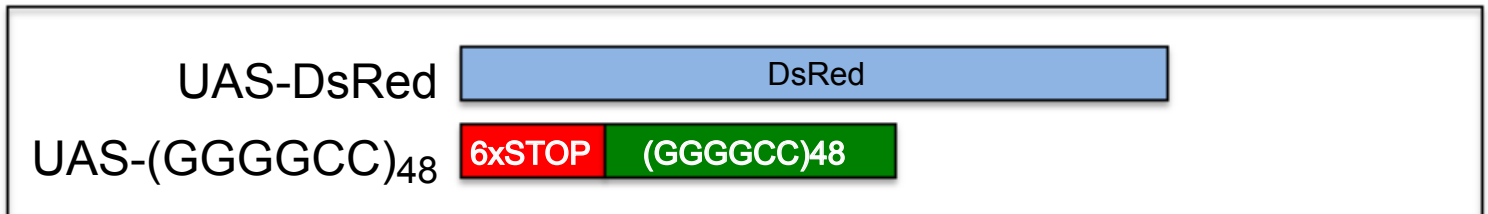

Figure 1–figure supplement 2. Schweizer Burguete et al.

Supplement: supp [file elife_poa_e08881_Figure_1_figure_supplement_2.pdf › elife_poa_e08881_Figure_1_figure_supplement_2.pdf]

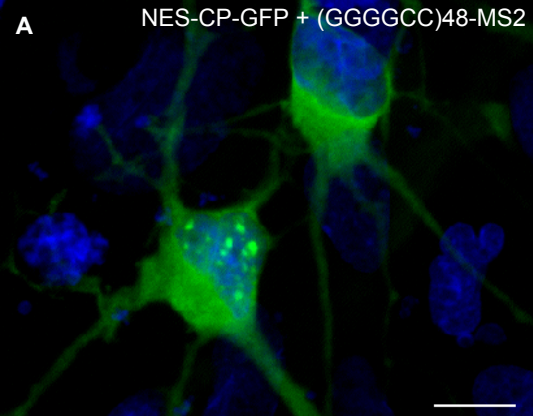

Figure 3-figure supplement 1. Schweizer Burguete et al.

Supplement: supp [file elife_poa_e08881_Figure_3_figure_supplement_1.pdf › elife_poa_e08881_Figure_3_figure_supplement_1.pdf]

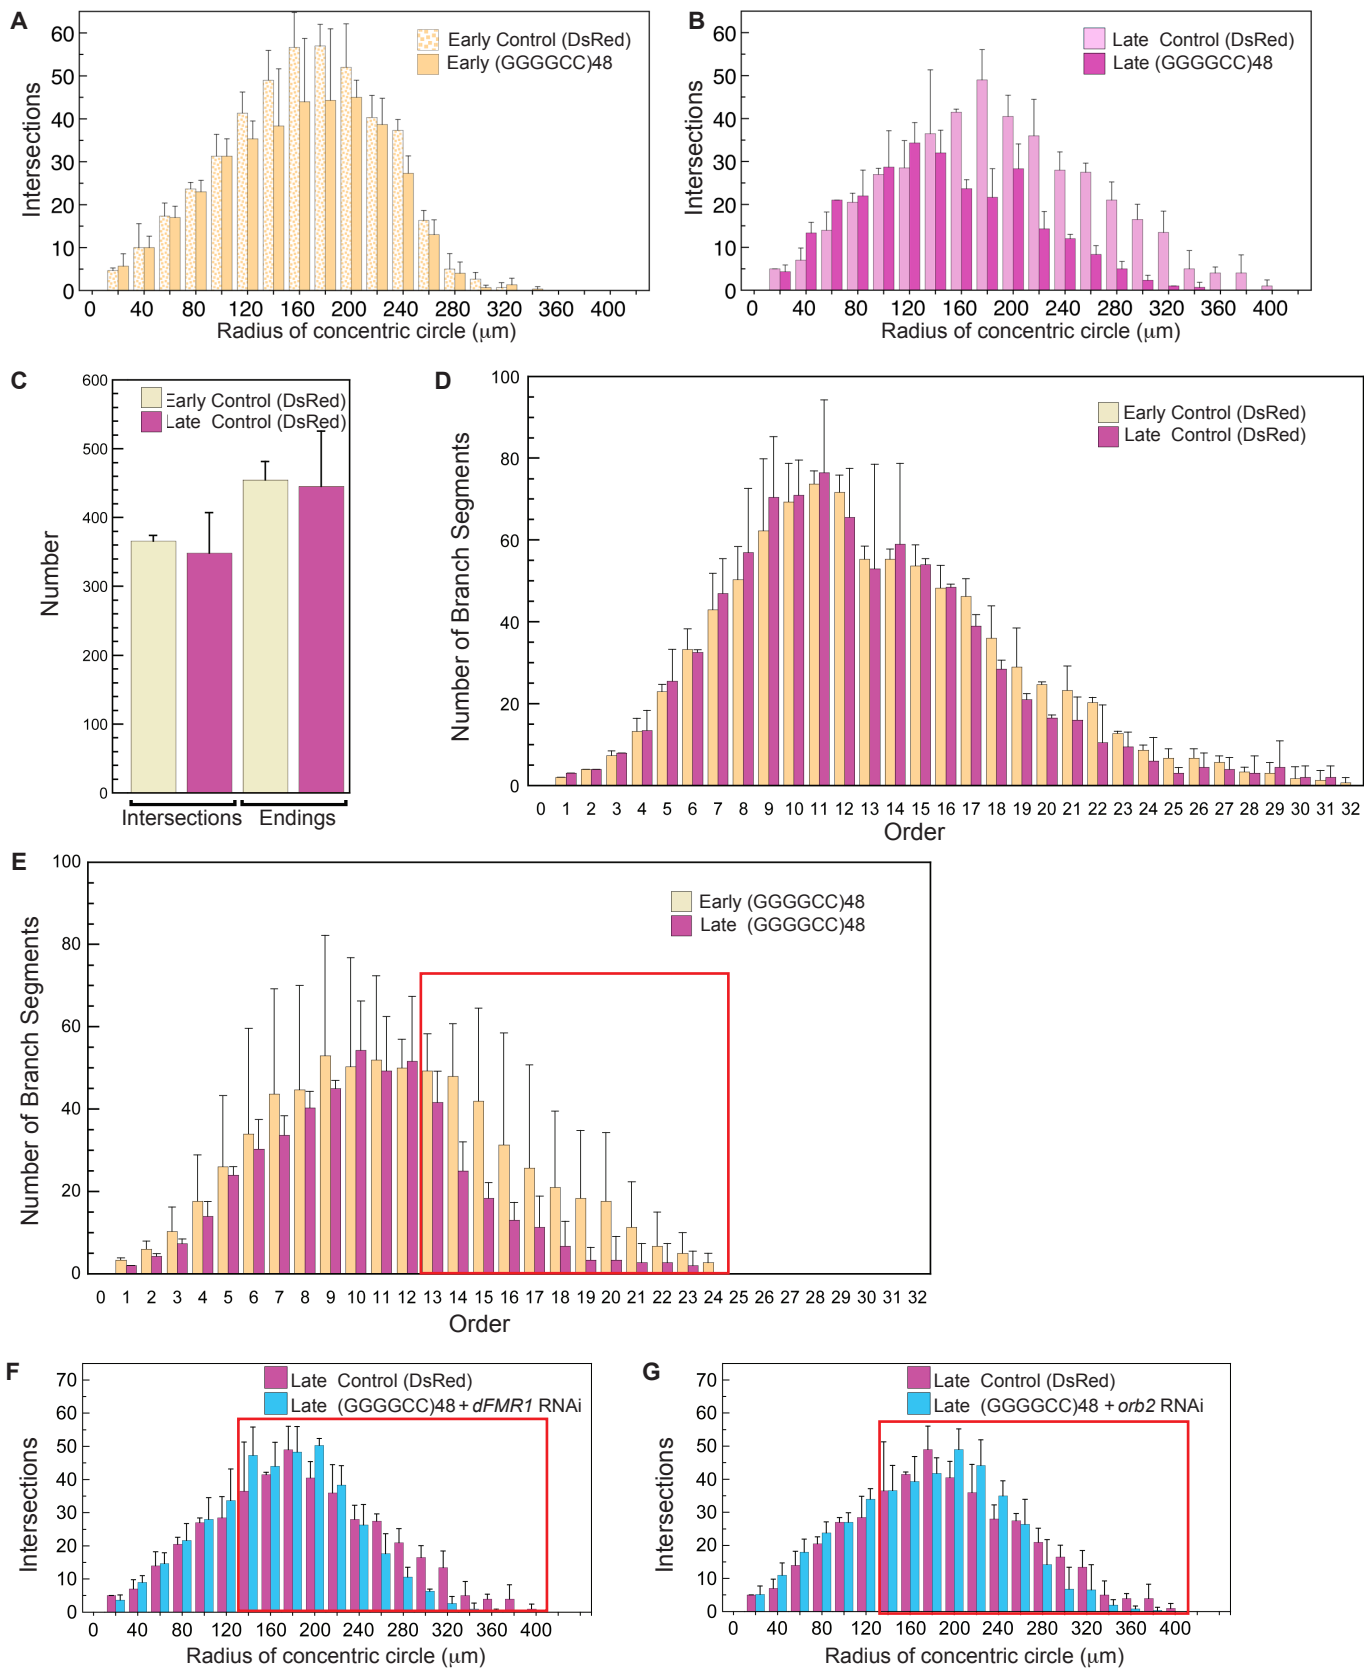

Figure 4-figure supplement 1. Schweizer Burguete et al.

Supplement: supp [file elife_poa_e08881_Figure_4_figure_supplement_1.pdf › elife_poa_e08881_Figure_4_figure_supplement_1.pdf]

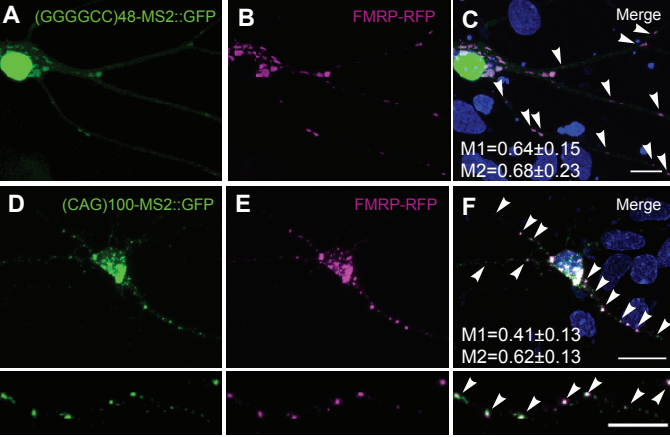

Figure 5–figure supplement 1. Schweizer Burguete et al.

Supplement: supp [file elife_poa_e08881_Figure_5_figure_supplement_1.pdf › elife_poa_e08881_Figure_5_figure_supplement_1.pdf]
